# Supplementary material
Source: Springer Nature journal article supplement (https://www.springermedizin.de/resource/supplementary/12877_2009_308_MOESM6_ESM.pdf/9439354)

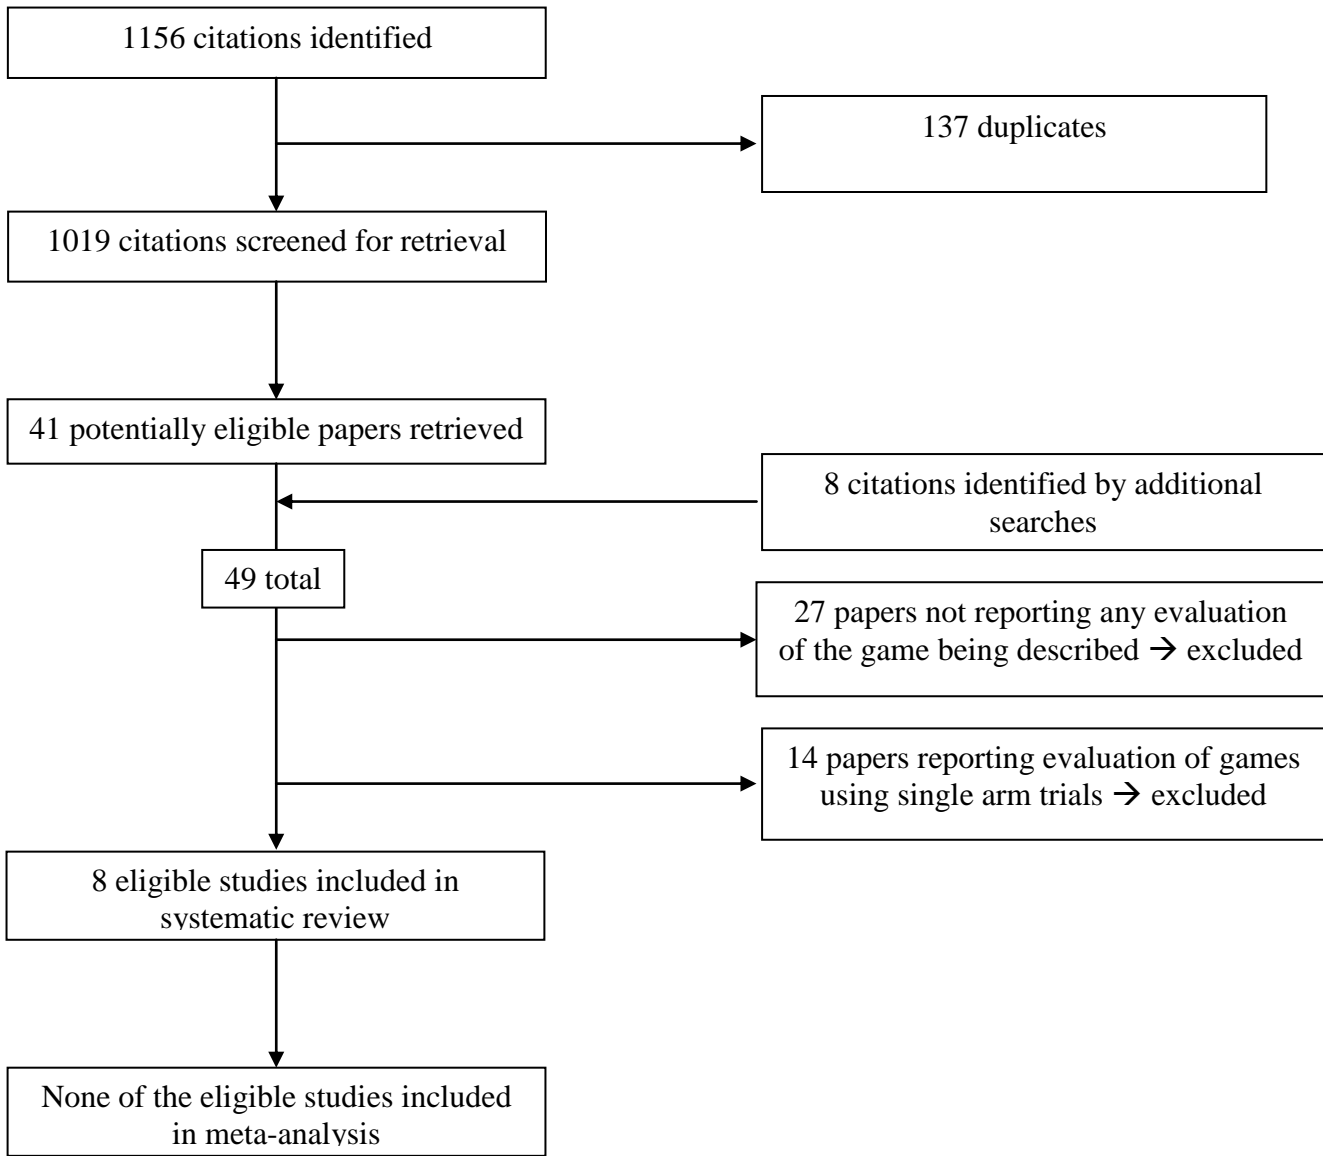

Supplement: MOESM6 [file 9439354]
